# Supplementary material for: The bioactive components as well as the nutritional and health effects of sea buckthorn
Source: Royal Society of Chemistry journal article supplement (doi:10.1039/d0ra06488b), 2020-01-01
Supplement: d0ra06488b1.pdf [file d0ra06488b1.pdf]

### Supplementary Information

**Supplementary Tab. 1** Flavonoids, phenolic acids and triterpenoids identified in SB

| No                         | Compound                                            | Parts                              |
|----------------------------|-----------------------------------------------------|------------------------------------|
| <b>Flavones aglycones</b>  |                                                     |                                    |
| 1                          | Isorhamnetin <sup>1, 2</sup>                        | Leaves, fruits, seeds, pulp, roots |
| 2                          | Quercetin <sup>1-4</sup>                            | Leaves, fruits, seeds, root        |
| 3                          | Kaempferol <sup>1, 2</sup>                          | Leaves, fruits, pulp, root         |
| 4                          | Myricetin <sup>1, 2</sup>                           | Seeds, leaves, pulp, fruits, roots |
| 5                          | Syringetin <sup>1</sup>                             | Roots                              |
| 6                          | Pentamethylquercetin <sup>1</sup>                   | Roots                              |
| 7                          | Catechin <sup>3, 5</sup>                            | Leaves, branches                   |
| 8                          | Epicatechin <sup>6</sup>                            | Fruits                             |
| 9                          | (+)-galocatechin <sup>5</sup>                       | Branches                           |
| 10                         | (-)-epigallocatechin <sup>5</sup>                   | Branches                           |
| <b>Flav-monoglycosides</b> |                                                     |                                    |
| 11                         | Isorhamnetin-7-rha <sup>7</sup>                     | Pomace                             |
| 12                         | Isorhamnetin-3-glu <sup>6, 7</sup>                  | Pomace, fruits                     |
| 13                         | Isorhamnetin-3-rha <sup>4, 8</sup>                  | Fruits                             |
| 14                         | Isorhamnetin-3-galactoside <sup>9</sup>             | Fruits                             |
| 15                         | Quercetin-3-glu <sup>7, 8</sup>                     | Pomace, fruits                     |
| 16                         | Quercetin-3-galactoside <sup>2</sup>                | Seeds, leaves, pulp, fruits        |
| 17                         | Quercetin-3-rha <sup>8</sup>                        | Fruits                             |
| 18                         | Kaempferol-7-rha <sup>10</sup>                      | Fruits                             |
| 19                         | Kaempferol-3-glu <sup>6</sup>                       | Fruits                             |
| 20                         | Syringetin-3-glu <sup>11</sup>                      | Juice concentrate                  |
| <b>Flav-di-glycosides</b>  |                                                     |                                    |
| 21                         | Isorhamnetin-3-rutinoside <sup>4, 7</sup>           | Pomace, fruits, leaves             |
| 22                         | Isorhamnetin-3-neohesperidoside <sup>4</sup>        | Fruits, leaves                     |
| 23                         | Isorhamnetin-3-glu-7-rha <sup>4, 7, 12</sup>        | Pomace, fruits, leaves, seeds      |
| 24                         | Isorhamnetin-3,7-di-glu <sup>7</sup>                | Pomace                             |
| 25                         | Quercetin-3-rutinoside <sup>2, 4, 7</sup>           | Pomace, leaves, fruits, pulp       |
| 26                         | Quercetin-3-glu-7-rha <sup>4, 7, 8</sup>            | Pomace, leaves, fruits             |
| 27                         | Quercetin-3-galactoside-7-rha <sup>8</sup>          | Fruits                             |
| 28                         | Kaempferol-3-rutinoside <sup>4, 8</sup>             | Leaves, fruits                     |
| 29                         | Kaempferol-3-neohesperidoside <sup>4</sup>          | Leaves                             |
| 30                         | Kaempferol-3-arabinoside-7-rha <sup>12</sup>        | Seeds                              |
| 31                         | Kaempferol-3-glu-7-rha <sup>12</sup>                | Seeds                              |
| <b>Flav-tri-glycosides</b> |                                                     |                                    |
| 32                         | Isorhamnetin-3-rutinoside-7-rha <sup>7</sup>        | Pomace                             |
| 33                         | Isorhamnetin-3-rutinoside-7-glu <sup>4, 8</sup>     | Fruits, leaves                     |
| 34                         | Isorhamnetin-3-neohesperidoside-7-glu <sup>4</sup>  | leaves                             |
| 35                         | Isorhamnetin-3-sophoroside-7-rha <sup>4, 7</sup>    | Pomace, fruits, leaves             |
| 36                         | Isorhamnetin-3-O-(2,6-dirhamnosyl)-glu <sup>8</sup> | Fruits                             |

|                                 |                                                                                                                                    |                        |
|---------------------------------|------------------------------------------------------------------------------------------------------------------------------------|------------------------|
| 37                              | Quercetin-3-rhamnosylglucoside-7-rha <sup>4</sup>                                                                                  | Fruits, leaves         |
| 38                              | Quercetin-3-sophoroside-7-rha <sup>4, 7</sup>                                                                                      | Pomace, fruits, leaves |
| 39                              | Quercetin-3-O-(2-rutinosyl)-glu <sup>8</sup>                                                                                       | Fruits                 |
| 40                              | Kaempferol-3-rutinoside-7-rha <sup>7, 12</sup>                                                                                     | Pomace, seeds          |
| 41                              | Kaempferol-3-sophoroside-7-rha <sup>6, 7, 13</sup>                                                                                 | Pomace, fruits, seeds  |
| <b>Flav-acylated-glycosides</b> |                                                                                                                                    |                        |
| 42                              | Isorhamnetin-3-coumaroyl-glu-glu-7-rha <sup>7</sup>                                                                                | Pomace                 |
| 43                              | Isorhamnetin-3-hydroxyferuloyl-glu-glu-7-rha <sup>7, 8</sup>                                                                       | Pomace, fruits         |
| 44                              | Quercetin-3-coumaroyl-glu-glu-7-rha <sup>7</sup>                                                                                   | Pomace                 |
| 45                              | Quercetin-(methyl) <sub>2</sub> -3-hydroxyferuloyl-glu-glu-7-rha <sup>7</sup>                                                      | Pomace                 |
| 46                              | Quercetin-(methyl) <sub>2</sub> -3-caffeoyl-glu-glu-7-rha <sup>7</sup>                                                             | Pomace                 |
| 47                              | Kaempferol-3-hydroxyvanilloyl-glu-glu-7-rha <sup>7</sup>                                                                           | Pomace                 |
| 48                              | Kaempferol-3-O-β-D-(6'-O-coumaryl) glycoside <sup>14</sup>                                                                         | Leaves                 |
| 49                              | Kaempferol-3-O-β-D-glu-7-O-[[2E)-2,6-dimethyl-6-hydroxy-2,7-octadienoyl (1→2)]]-α-L-rha <sup>12</sup>                              | Seeds                  |
| 50                              | Isorhamnetin-(3-O-[(6-O-E-sinapoyl)-β-D-glu-(1→2)]-β-D-glu-7-O-α-L-rha) <sup>15</sup>                                              | Fruits, leaves         |
| 51                              | Quercetin-(3-O-[(6-O-E-sinapoyl)-β-D-glu-(1→2)]-β-D-glu-7-O-α-L-rha) <sup>15</sup>                                                 | Fruits, leaves         |
| 52                              | Kaempferol-3-O-β-D-rutinosyl-7-O-{2-O-[(2E)-2,6-dimethyl-6-hydroxy-2,7-octadienoyl]}-β-D-glu <sup>13</sup>                         | Seeds                  |
| 53                              | Isorhamnetin-3-O-β-D-rutinosyl-7-O-{2-O-[(2E)-2,6-dimethyl-6-hydroxy-2,7-octadienoyl]}-β-D-glu <sup>13</sup>                       | Seeds                  |
| 54                              | Kaempferol-3-O-β-D-glu-7-O-{2-O-[(2E)-2,6-dimethyl-6-hydroxy-2,7-octadienoyl]}-β-D-glu <sup>13</sup>                               | Seeds                  |
| 55                              | Kaempferol-3-O-[(2E)-2,6-dimethyl-6-hydroxy-2,7-octadienoyl (1→6)]-β-D-glu(1→2)-β-D-glu-7-O-α-L-rha <sup>13</sup>                  | Seeds                  |
| 56                              | Kaempferol-3-O-β-D-sophoroside-7-O-[[2E)-2,6-dimethyl-6-hydroxy-2,7-octadienoyl (1→2)]]-α-L-rha <sup>12, 13</sup>                  | Seeds                  |
| 57                              | Kaempferol-3-O-β-D-sophoroside-7-O-[[2E)-2,6-dimethyl-6-hydroxy-2,7-octadienoyl (1→3)]]-α-L-rha <sup>13</sup>                      | Seeds                  |
| 58                              | Kaempferol-3-O-(6-O-3,4,5-trimethoxycinnamoyl)-β-D-glu (1→2)-β-D-glu-7-O-α-L-rha <sup>12, 13</sup>                                 | Seeds                  |
| 59                              | Kaempferol-(3-O-[(6-O-E-sinapoyl)-β-D-glu-(1→2)]-β-D-glu-7-O-α-L-rha) <sup>13, 15</sup>                                            | Fruits, leaves, seeds  |
| 60                              | Kaempferol-3-O-(6-O-E-feruloyl)-β-D-glu(1→2)-β-D-glu-7-O-[(2E)-2,6-dimethyl-6-hydroxy-2,7-octadienoyl (1→2)]-α-L-rha <sup>13</sup> | Seeds                  |
| 61                              | Kaempferol-3-O-(6-O-E-sinapoyl)-β-D-glu(1→2)-β-D-glu-7-O-[(2E)-2,6-dimethyl-6-hydroxy-2,7-octadienoyl (1→2)]-α-L-rha <sup>13</sup> | Seeds                  |
| 62                              | Kaempferol-3-O-(6-O-E-feruloyl)-β-D-glu(1→2)-β-D-glu-7-O-[(2E)-2,6-dimethyl-6-hydroxy-2,7-octadienoyl (1→3)]-α-L-rha <sup>13</sup> | Seeds                  |
| 63                              | Kaempferol-3-O-(6-O-E-sinapoyl)-β-D-glu(1→2)-β-D-glu-7-O-[(2E)-2,6-dimethyl-6-hydroxy-2,7-octadienoyl (1→3)]-α-L-rha <sup>13</sup> | Seeds                  |

#### Phenolic acids

|                    |                                                                                                                                                                                                                                      |                                                 |
|--------------------|--------------------------------------------------------------------------------------------------------------------------------------------------------------------------------------------------------------------------------------|-------------------------------------------------|
| 64                 | Gallic acid <sup>16, 17</sup>                                                                                                                                                                                                        | Fruits, pulp, seed kernel, seed coat and leaves |
| 65                 | Protocatechuic acid <sup>16, 17</sup>                                                                                                                                                                                                | Fruits, pulp, seed kernel, seed coat, leaves    |
| 66                 | p-Hydroxybenzoic acid <sup>17</sup>                                                                                                                                                                                                  | Pulp, seed kernel, seed coat and leaves         |
| 67                 | Vanillic acid <sup>17</sup>                                                                                                                                                                                                          | Pulp, seed kernel, seed coat and leaves         |
| 68                 | Salicylic acid <sup>17</sup>                                                                                                                                                                                                         | Pulp                                            |
| 69                 | Syringic acid <sup>6</sup>                                                                                                                                                                                                           | Fruits                                          |
| 70                 | Ferulic acid <sup>16, 17</sup>                                                                                                                                                                                                       | Fruits, pulp, seed kernel, seed coat and leaves |
| 71                 | p-Coumaric acid <sup>6, 17</sup>                                                                                                                                                                                                     | Fruits, pulp, seed kernel, leaves               |
| 72                 | Cinnamic acid <sup>17</sup>                                                                                                                                                                                                          | Pulp, seed kernel, seed coat and leaves         |
| 73                 | Caffeic acid <sup>17</sup>                                                                                                                                                                                                           | Pulp, seed kernel, seed coat and leaves         |
| 74                 | Ellagic acid <sup>9, 18</sup>                                                                                                                                                                                                        | Fruits, leaves                                  |
| 75                 | 1-Feruloyl- $\beta$ -D-glu <sup>14</sup>                                                                                                                                                                                             | Leaves                                          |
| <b>Triterpenes</b> |                                                                                                                                                                                                                                      |                                                 |
| 76                 | Oleanolic acid <sup>19, 20</sup>                                                                                                                                                                                                     | Fruits                                          |
| 77                 | Ursolic acid <sup>5, 20</sup>                                                                                                                                                                                                        | Fruits, branches                                |
| 78                 | 19- $\alpha$ -Hydroxyursolic acid <sup>20</sup>                                                                                                                                                                                      | Fruits                                          |
| 79                 | 3-O- $[\beta$ -D-glu(1 $\rightarrow$ 2)- $\beta$ -D-glu-(1 $\rightarrow$ 3)]- $[\alpha$ -L-rha-(1 $\rightarrow$ 2)]- $\alpha$ -L-arabinopyranosyl-13-ene-19-one-28-oic acid 28-O- $\beta$ -D-glu ester <sup>21</sup>                 | Seed residue                                    |
| 80                 | 3-O- $[\beta$ -D-glu(1 $\rightarrow$ 2)- $\beta$ -D-glu-(1 $\rightarrow$ 3)]- $[\alpha$ -L-rha-(1 $\rightarrow$ 2)]- $\alpha$ -L-arabinopyranosyl-13-ene-19-one-30-hydroxyolean-28-oic acid 28-O- $\beta$ -D-glu ester <sup>21</sup> | Seed residue                                    |
| 81                 | 3-O- $[\beta$ -D-glu(1 $\rightarrow$ 2)- $\beta$ -D-glu-(1 $\rightarrow$ 3)]- $[\alpha$ -L-rha-(1 $\rightarrow$ 2)]- $\beta$ -D-glu-13-ene-19-one-28-oic acid 28-O- $\beta$ -D-glu ester <sup>21</sup>                               | Seed residue                                    |
| 82                 | 3-O- $[\beta$ -D-glu(1 $\rightarrow$ 2)- $\beta$ -D-glu-(1 $\rightarrow$ 3)]- $[\alpha$ -L-rha-(1 $\rightarrow$ 2)]- $\beta$ -D-glu-13-ene-19-one-30-hydroxyolean-28-oic acid 28-O- $\beta$ -D-glu ester <sup>21</sup>               | Seed residue                                    |
| 83                 | Dulcic acid <sup>20</sup>                                                                                                                                                                                                            | Fruits                                          |
| <b>Others</b>      |                                                                                                                                                                                                                                      |                                                 |
| 84                 | 5-Hydroxymethyl-2-furancarbox-aldehyde <sup>20</sup>                                                                                                                                                                                 | Fruits                                          |
| 85                 | Cirsiumaldehyde <sup>20</sup>                                                                                                                                                                                                        | Fruits                                          |
| 86                 | Ethyl 3, 4, 5-trihydroxybenzoate <sup>22</sup>                                                                                                                                                                                       | Leaves                                          |
| 87                 | Hydroxycoumarin <sup>6</sup>                                                                                                                                                                                                         | Fruits                                          |
| 88                 | Nectandrin B <sup>20</sup>                                                                                                                                                                                                           | Fruits                                          |
| 89                 | (+)-Fragransin A2 <sup>19</sup>                                                                                                                                                                                                      | Fruits                                          |
| 90                 | (-)-Saucernetindiol <sup>19</sup>                                                                                                                                                                                                    | Fruits                                          |
| 91                 | Casuarinin <sup>23</sup>                                                                                                                                                                                                             | Leaves                                          |
| 92                 | Hippophae cerebroside <sup>20</sup>                                                                                                                                                                                                  | Fruits                                          |

**Supplementary Tab. 2** The main pharmacological effects of SB

| <b>Parts, preparation (treatment dosage)</b>                                                                                                                                                                                           | <b>Subjects</b>                                                                                                                            | <b>Pharmacological effects</b>                                                  | <b>Possible mechanism or the variation of biochemical parameters</b>                                                                                                                               |
|----------------------------------------------------------------------------------------------------------------------------------------------------------------------------------------------------------------------------------------|--------------------------------------------------------------------------------------------------------------------------------------------|---------------------------------------------------------------------------------|----------------------------------------------------------------------------------------------------------------------------------------------------------------------------------------------------|
| <b>Anti-inflammatory effects</b>                                                                                                                                                                                                       |                                                                                                                                            |                                                                                 |                                                                                                                                                                                                    |
| Fruits, the extract (50 mg/kg p.o.) <sup>24</sup>                                                                                                                                                                                      | Rats                                                                                                                                       | Protecting against methotrexate-induced oropharyngeal oxidative damage          | Decreasing the levels of malondialdehyde (MDA), interleukin (IL)-1 $\beta$ and tumor necrosis factor (TNF)- $\alpha$ , while increasing the level of total glutathione in the oropharyngeal tissue |
| Dried residues (including seeds, fruit flesh and peel), the oil [40 $\mu$ L (was prepared in cream form 200 $\mu$ L) T.A to mice; 0~200mg/L for cells] <sup>25</sup>                                                                   | 2,4-dinitrochloro-benzene (DNCB)-induced atopic dermatitis-like lesions mouse model; Human keratinocyte HaCaT cells                        | Improvement of atopic dermatitis-like skin lesions                              | Inhibiting the helper (Th)2 cell chemokines thymus and activation-regulated chemokine (TARC) and macrophage-derived chemokine (MDC) in inflamed skin                                               |
| Pulp, the oil (SBKT) ( I . 1, 1.25, 2.5 and 5 $\mu$ L/mL to human monocytic (THP-1) cells; II . 100 mg/kg p.o. + 40 $\mu$ L/paw T.A. to rats; III. 100 mg/kg p.o. + 20 $\mu$ L T.A and 200 mg/kg p.o. + 20 $\mu$ L T.A.) <sup>26</sup> | Human monocytic (THP -1) cells; Rat paw edema model; 12-O tetradecanoylphorbol 13- acetate (TPA)-induced psoriasis-like lesion mouse model | Anti-inflammatory and anti-psoriasis-like efficacies                            | Inhibiting of reactive nitrogen species, and downregulating of NF- $\kappa$ B protein and pro-inflammatory cytokines                                                                               |
| Leaves, the supercritical extract (SCE200 ET) (27 $\mu$ g/kg b. w. i. p.) and its active component isorhamnetin <sup>27</sup>                                                                                                          | Mice                                                                                                                                       | Inhibiting endotoxemia; Potential for the treatment of endotoxin induced sepsis | Reducing inflammatory cytokines and nitric oxide synthase 2 expression                                                                                                                             |

|                                                                                                                                                                               |                                                     |                                                                                                            |                                                                                                          |
|-------------------------------------------------------------------------------------------------------------------------------------------------------------------------------|-----------------------------------------------------|------------------------------------------------------------------------------------------------------------|----------------------------------------------------------------------------------------------------------|
| Peel, seeds and whole fruits, the 70% methanol extracts; peel, the chloroform extract; (500 mg/kg, p. o.); the active component ursolic acid and oleanolic acid <sup>19</sup> | Compound 48/80-induced rat paw edema model          | Anti-inflammatory activity; antiallergic activity                                                          | A membrane stabilizing effect caused by the inhibition of degranulation of mast cells                    |
| A mixture of SB and St. John's wort oils (2 mL/rat p. o.) <sup>28</sup>                                                                                                       | Surgically-induced endometriosis rat model          | Potential for the treatment of endometriosis                                                               | Decreasing the levels of TNF- $\alpha$ , vascular endothelial growth factor and IL-6                     |
| <b>Immunomodulatory activity</b>                                                                                                                                              |                                                     |                                                                                                            |                                                                                                          |
| Leaves, the 70% ethanol extract (100 mg/kg b. w. i. p.) <sup>29</sup>                                                                                                         | Young (3 month) and old (> 17 month) mice           | Strengthening the immune response of aged ones                                                             | Increasing IFN- $\gamma$ , IL-2 receptor alpha chain (CD25) and MHC II expression                        |
| Leaves, the supercritical extracts (SCEs 300ET and 350ET) (0.1 $\mu$ g/mouse i. p.) <sup>30</sup>                                                                             | Mice immunized with Tetanus and Diphtheria toxoids  | Increasing both antibody and cellular response, as well as the generation of the secondary immune response | Increasing cytokine levels (IFN- $\gamma$ , IL-4, TNF- $\alpha$ and IL-1 $\beta$ and lymphoproliferation |
| Fruit residue (fruit flesh, seeds and peel), the oil (5 and 10 mL/kg p.o.) <sup>31</sup>                                                                                      | Rats                                                | Increasing NK cell cytotoxicity in chronic-stress rat model                                                | Upregulating the expression of perforin and granzyme B                                                   |
| SB polysaccharide (200 $\mu$ g/mL-600 $\mu$ g/mL) <sup>32</sup>                                                                                                               | Intestinal porcine epithelial cells (IPEC-J2 cells) | Protecting against LPS-induced IPEC-J2 cell damage                                                         | Inhibiting TLR4/NF- $\kappa$ B signaling pathway                                                         |
| Fruits, a natural high-methoxyl homogalacturonan (HRWP-A) (50 mg/kg i.g.) <sup>33</sup>                                                                                       | Mice                                                | Enhancing viability of peritoneal macrophages from cyclophosphamide - induced immunosuppressed mice        | Activating TLR4/MyD88 pathway                                                                            |
| Fruits, the total flavonoids of SB (2.5 or 5.0 mg/L) <sup>34</sup>                                                                                                            | Natural killer (NK)92-MI cells                      | Increasing cytotoxicity of NK92-MI cells against K562 cells                                                | Upregulating the expressions of perforin and granzymes B                                                 |
| <b>Hepatoprotective effect</b>                                                                                                                                                |                                                     |                                                                                                            |                                                                                                          |
| *Fruits, the hexane extract (HRe-1) (250                                                                                                                                      | Rat                                                 | Attenuating nicotine-induced oxidative                                                                     | Antioxidant activity                                                                                     |

|                                                                                                      |                                         |  |                                                                                                                              |                                                                                                                                                                                                                 |
|------------------------------------------------------------------------------------------------------|-----------------------------------------|--|------------------------------------------------------------------------------------------------------------------------------|-----------------------------------------------------------------------------------------------------------------------------------------------------------------------------------------------------------------|
| mg/kg/day, i.g.) <sup>35</sup>                                                                       |                                         |  | stress in the liver.                                                                                                         |                                                                                                                                                                                                                 |
| *Seeds, the oil (0.26 1.30 and 2.60 mg/kg p.o.) <sup>36</sup>                                        | Mice                                    |  | Protecting against carbon tetrachloride (CCl <sub>4</sub> )-induced hepatic damage                                           | Antioxidant activity                                                                                                                                                                                            |
| *Leaves, the phenolic rich fraction (25~75 mg/kg p.o.) <sup>37</sup>                                 | Rat                                     |  | Protecting against CCl <sub>4</sub> induced oxidative damage in the liver.                                                   | Antioxidant activity                                                                                                                                                                                            |
| *Fruits, the polysaccharide extracts (50, 100, 200 mg/kg p.o.) <sup>38</sup>                         | Mice                                    |  | Protecting against LPS/d-galactosamine hydrochloride (d-GalN)-induced acute liver failure                                    | Antioxidant activity;<br>Suppressing the TLR4-NF-κB signaling pathway                                                                                                                                           |
| *Fruits, the polysaccharide extracts (100 and 200 mg/kg p.o.) <sup>39</sup>                          | Mice                                    |  | Protecting against acetaminophen-induced hepatotoxicity                                                                      | Antioxidant activity;<br>Activating the nuclear factor erythroid-2-related factor (Nrf)-2/hemeoxygenase-(HO)-1-superoxide dismutase (SOD)-2 signaling pathway                                                   |
| <i>Panax ginseng</i> roots and SB fruits, the aqueous extract (100, 200 and 400 mg/kg) <sup>40</sup> | Mice                                    |  | Countering acute alcohol intoxication                                                                                        | Increasing the levels of alcohol dehydrogenase, aldehyde dehydrogenase, decreasing microsomal ethanol oxidase activity in liver and decreasing the concentration of β-endorphin and leucine-enkephalin in brain |
| Fruits, the active components (20 and 40 mg/kg i.g. to rats) <sup>9</sup>                            | Rat hepatic stellate cells (HSCs); Rats |  | Inhibiting transforming growth factor-β induced activation of HSCs; Anti-liver fibrosis (bile duct ligation-induced in rats) | Regulating DNA damage signaling                                                                                                                                                                                 |

---

### Cardiovascular protection

|                                                                                     |                                       |  |                                                                          |                                                                          |
|-------------------------------------------------------------------------------------|---------------------------------------|--|--------------------------------------------------------------------------|--------------------------------------------------------------------------|
| Seed residues, the total flavones (50, 100 or 150 mg/kg/day) <sup>41</sup>          | Sucrose-fed rats                      |  | Suppressing the elevated hypertension, hyperinsulinemia and dyslipidemia | Improving insulin sensitivity and blocking angiotensin II signal pathway |
| Seed residues, the total flavonoids (50, 100 and 150 mg/kg b.w. p.o.) <sup>42</sup> | High-fat diet fed mice                |  | Hypolipidaemic and hypoglycaemic effects                                 | Not clear                                                                |
| Extraction residues <sup>43</sup>                                                   | Healthy normal-weight male volunteers |  | Delay postprandial lipemia                                               | Not clear                                                                |

|                                                                                                                |                                                            |                                                                           |                                                                                                                                                                                                                                                |
|----------------------------------------------------------------------------------------------------------------|------------------------------------------------------------|---------------------------------------------------------------------------|------------------------------------------------------------------------------------------------------------------------------------------------------------------------------------------------------------------------------------------------|
| Pulp, the oil (5, 10, and 20 mL/kg/day p.o.) <sup>44</sup>                                                     | Rats                                                       | Protecting against myocardial ischemia-reperfusion injury                 | Activating protein kinase B-endothelial nitric oxide synthase (Akt/eNOS) signaling pathway; inhibiting TNF- $\alpha$ / IKK $\beta$ /NF- $\kappa$ B                                                                                             |
| SB oil (20 mL/kg/day) <sup>45</sup>                                                                            | Rats                                                       | Protecting against isoproterenol-induced myocardial damage                | Antioxidant activity                                                                                                                                                                                                                           |
| Fruits, the total flavones (300 $\mu$ g/kg, intravenously) <sup>46</sup>                                       | Mouse femoral artery thrombosis model                      | Preventing in-vivo thrombogenesis                                         | Inhibiting platelet aggregation                                                                                                                                                                                                                |
| *Fruits, the phenolic fraction (0.5-50 $\mu$ g/mL) <sup>47</sup>                                               | Human plasma and blood platelet                            | Antioxidant and antiplatelet activity                                     | Inhibiting H <sub>2</sub> O <sub>2</sub> or H <sub>2</sub> O <sub>2</sub> /Fe induced plasma lipid peroxidation and protein carbonylation; reducing the production of TBARS and superoxide anion in resting and thrombin-stimulated platelets. |
| Fruits, the phenolic fraction (0.5-50 $\mu$ g/mL) <sup>48</sup>                                                | Human blood platelet                                       | Inhibiting blood platelets adhesion to collagen and fibrinogen            | Not clear                                                                                                                                                                                                                                      |
| Fruits and leaves, the flavone (75 mg/kg p.o. to mice; 0.2 mg/mL, 1.0 mg/mL to Mouse PBMC) <sup>49</sup>       | Mouse PBMC; The apoE (apoE <sup>-/-</sup> ) deficient mice | Inhibiting macrophage foaming, inflammation and vascular plaque formation | Upregulating the expression level of C1q/tumor necrosis factor-related proteins 6 (CTRP6)                                                                                                                                                      |
| Seeds, the oil (1 mL, p.o.) <sup>50</sup>                                                                      | Rabbits                                                    | Anti-atherogenic activity                                                 | Decreasing plasma cholesterol, LDL-cholesterol levels and increasing HDL-cholesterol levels                                                                                                                                                    |
| <b>Effect on diabetes and glycometabolism</b>                                                                  |                                                            |                                                                           |                                                                                                                                                                                                                                                |
| Seed residues, the aqueous extract (400 mg/kg/day b.w. p.o.) <sup>51</sup>                                     | Streptozotocin-induced diabetic rats                       | Hypoglycemic, hypotriglyceridemic and antioxidant effects                 | Not clear                                                                                                                                                                                                                                      |
| Whole fruits and the 70% ethanol soluble fraction <sup>52</sup>                                                | Healthy normal-weight male volunteers (n=10)               | Improving postprandial glycemic control                                   | Not clear                                                                                                                                                                                                                                      |
| Leaves, the n-butanol fraction, the methanolic extract, the hexane fraction ect. (5 $\mu$ g/ mL) <sup>14</sup> | In vitro assay                                             | $\alpha$ -glucosidase inhibitory effect                                   | Not clear                                                                                                                                                                                                                                      |
| Seeds, the 70% ethanol elution fraction,                                                                       | In vitro assay                                             | $\alpha$ -glucosidase inhibitory activity                                 | Not clear                                                                                                                                                                                                                                      |

kaempferol ect.<sup>13</sup>

**Anti-cancer effect**

|                                                                                                                                           |                                                            |                                                                                                                                  |                                                                                                                                                                                          |
|-------------------------------------------------------------------------------------------------------------------------------------------|------------------------------------------------------------|----------------------------------------------------------------------------------------------------------------------------------|------------------------------------------------------------------------------------------------------------------------------------------------------------------------------------------|
| Fruit pulp, the 80% ethanol extract (150 and 300 mg/kg, b.w. p.o.) <sup>53</sup>                                                          | Mice                                                       | Inhibiting forestomach and benzo(a)pyrene-induced and 7,12-dimethyl benzanthracene (DMBA)-induced skin papillomagenesis in mouse | Up-regulating phase II and antioxidant enzymes as well as DNA-binding activity of interferon regulatory factor-1                                                                         |
| Quercetin (2.5-40µM), pentamethyl-quercetin (2.5-20µM), kaempferol, myricetin, syringetin, isorhamnetin (10-40µM) from roots <sup>1</sup> | Human promyelotic leukemia HL-60 cells                     | Antiproliferative activity                                                                                                       | Quercetin, kaempferol and myricetin: the induction of apoptosis; other 3 flavonols: without induction of apoptosis, different from above 3 flavonols                                     |
| Isorhamnetin (25-300 µg/mL for 12, 24, 48 and 72 h) <sup>54</sup>                                                                         | Human hepatocellular carcinoma cells (BEL-7402)            | The cytotoxic effects against human hepatocellular carcinoma cells BEL-7402 cells                                                | Appearance of a hypodiploid peak (sub-G <sub>0</sub> /G <sub>1</sub> peak), probably related to apoptosis                                                                                |
| Branches, the 70% ethanol extract (1.0 mg/mouse T.A.) <sup>5</sup>                                                                        | Mice                                                       | Inhibiting skin papillomas promoted by TPA following initiated by DMBA in mice                                                   | Not clear                                                                                                                                                                                |
| Leaves, the 50% ethanol extract (25, 50, and 100 µg/mL) <sup>55</sup>                                                                     | Human acute myeloid leukemia cells (KG-1a, HL60, and U937) | Antiproliferative effect (all doses for HL60, 100 µg/mL for KG-1a and U937)                                                      | Activating the S phase checkpoint, which probably led to deceleration of the cell cycle and apoptosis induction                                                                          |
| Fruits, a watersoluble homogenous poly-saccharide (HRWP-A) (50, 100 and 200 mg/kg, i.g.) <sup>56</sup>                                    | Mice                                                       | Inhibiting the lewis lung carcinoma growth                                                                                       | Related to immunostimulating activity (enhancing the lymphocyte proliferation, the macrophage activities, NK cell activity and cytotoxic T lymphocyte cytotoxicity in tumor-bearing mice |
| *Leaves, the aqueous extract (0.62, 6.2, and 62 µg/mL) <sup>57</sup>                                                                      | Rat C6 glioma cells                                        | Antiproliferative activity                                                                                                       | Reducing reactive oxygen species (ROS) levels, inducing the early events of apoptosis                                                                                                    |
| *Fruits, the chemical extraction and in                                                                                                   | Human liver cancer cells                                   | Antiproliferative activity                                                                                                       | The cellular antioxidant capacity                                                                                                                                                        |



|                                                                                                            |                                                                                              |                                                                                                                                            |                                                                                                                                                    |
|------------------------------------------------------------------------------------------------------------|----------------------------------------------------------------------------------------------|--------------------------------------------------------------------------------------------------------------------------------------------|----------------------------------------------------------------------------------------------------------------------------------------------------|
| vitro digested samples <sup>6</sup>                                                                        | (HepG2), human breast cancer cells (MCF-7, MDA-MB-231) and human colon cancer cells (Caco-2) |                                                                                                                                            |                                                                                                                                                    |
| Fruits, the extract and some phenolic acids and flavonoids <sup>16</sup>                                   | Human liver cancer cells HepG2                                                               | Antiproliferative activity                                                                                                                 | Related to phenolic acids and flavonoid aglycones, but precise mechanisms was not studied.                                                         |
| <b>Neuroprotective effect</b>                                                                              |                                                                                              |                                                                                                                                            |                                                                                                                                                    |
| Fruits, SB juice (20% and 40%) (1mL/10 g b.w. p.o.) <sup>58</sup>                                          | Mice                                                                                         | Protecting against lead-induced neurotoxicity                                                                                              | Decreasing MDA Levels, acetyl-cholinesterase (AChE) and monoamine oxidase (MAO)-A and -B Activity; Increasing the level of 5-HT in cerebral tissue |
| Fruits, the aqueous extract (40 mg/kg b. w. p. o.) <sup>59</sup>                                           | Rats                                                                                         | Protecting against haloperidol-induced orofacial dyskinesia                                                                                | Increasing release of dopamine or decreasing dopamine turnover in rat striatum                                                                     |
| Leaves, the 75% alcoholic extract (100 and 200 mg/kg) <sup>60</sup>                                        | Rats                                                                                         | Protecting against scopolamine-induced cognitive impairment                                                                                | Reducing the increased AChE activity and MDA level in the brain                                                                                    |
| *Leaves, the 70% ethanol extract (200 µg/mL) <sup>61</sup>                                                 | C-6 glioma cells                                                                             | Protecting against hypoxia-induced oxidative injury in glial cells                                                                         | Inhibiting hypoxia induced cytotoxicity, mitochondrial integrity, ROS production and DNA damage                                                    |
| *Leaves, the aqueous extract (25, 50 and 100 µg/mL) <sup>62</sup>                                          | HT22 cells, hippocampus neurons                                                              | Inhibiting hypoxia induced oxidative stress                                                                                                | Relating to Janus kinase-signal transducers and activators of transcription (JAK/STAT) signaling                                                   |
| *Fruits and leaves, the 70% ethanol extract (3.2-100 µg/mL) <sup>63</sup>                                  | Human neuroblastoma cell line-IMR32                                                          | Protecting against hydrogen peroxide-induced cell cytotoxicity in a dose dependent manner                                                  | Antioxidant activity                                                                                                                               |
| *Leaves, the 80% aqueous methanol extract, the ethyl acetate fraction ( 5, 10, and 20 µg/mL) <sup>18</sup> | Neuronal PC-12 cells                                                                         | Protecting against H <sub>2</sub> O <sub>2</sub> -induced oxidative stress in PC-12 cells; enhancing cellular survival response to hypoxia | Blocking mitochondrial dysfunction against oxidative stress; a decrease in intracellular oxidative stress                                          |
| <b>Effects on the skin</b>                                                                                 |                                                                                              |                                                                                                                                            |                                                                                                                                                    |
| Seed residues, the 80% ethanol extract                                                                     | B16F10 mouse melanoma                                                                        | Anti-melanogenesis properties                                                                                                              | Decreasing the tyrosinase activity and down-regulating the                                                                                         |

|                                                                                                                           |                                                  |                                                                                              |                                                                                                                    |
|---------------------------------------------------------------------------------------------------------------------------|--------------------------------------------------|----------------------------------------------------------------------------------------------|--------------------------------------------------------------------------------------------------------------------|
| (45.45 µg/mL and 4.55 µg/mL) <sup>64</sup>                                                                                | cells                                            |                                                                                              | expression of tyrosinase and tyrosinase-related protein (TRP)-1                                                    |
| Emulsion formulations containing plant extracts (SB and <i>Cassia fistula</i> ) (500 mg, twice daily, T.A.) <sup>65</sup> | Patients with grade I and grade II acne vulgaris | Reducing skin sebum contents (anti-acne effects)                                             | Not clear                                                                                                          |
| SB fruit blend [containing SB fruit extract (31.1%), blueberry extract and collagen] (30 and 50%, p. o.) <sup>66</sup>    | hairless mice                                    | Against ultraviolet (UV) radiation-induced skin aging                                        | Regulating the moisture content, matrix metalloproteinase (MMP) expression levels and SOD activity                 |
| Seeds, the oil (500 ng/mL) <sup>67</sup>                                                                                  | Human keratinocytes and fibroblasts              | Skin photo-protection                                                                        | Against UV-induced disturbances in redox balance as well as lipid metabolism in skin fibroblasts and keratinocytes |
| Seeds, the oil (20 mL, T.A. respectively in recipient and donor sites) <sup>68</sup>                                      | Ovine burn wound model                           | Wound healing activity (full-thickness burns and split-thickness harvested wounds)           | Not clear                                                                                                          |
| Leaves, polyvinyl alcohol-blended pectin hydrogel containing the leaves extract (T.A.) <sup>69</sup>                      | Rat acute wound models                           | Enhancing wound healing                                                                      | Not clear                                                                                                          |
| <b>Effects on eye disease</b>                                                                                             |                                                  |                                                                                              |                                                                                                                    |
| Seeds and pulp, the oil (2 g/day, p. o.) <sup>70</sup>                                                                    | Patients with dry eyes                           | Alleviating dry eye symptoms and the increase in tear film osmolarity during the cold season | Not clear                                                                                                          |
| Pulp, the oil (0.5 and 2.5 mL/kg, p. o.) and palmitoleate <sup>71</sup>                                                   | Murine dry eye model                             | Restoring aqueous tear secretion to its normal value                                         | Suppressing inflammatory cytokines and chemokines in the lacrimal gland                                            |
| *Proanthocyanidins from seeds (50 and 100 mg/kg/day, p.o.) <sup>72</sup>                                                  | Pigmented rabbits                                | Protecting against visible light-induced retinal degeneration                                | Antioxidant, anti-inflammatory and antiapoptotic mechanisms                                                        |
| *Total flavones from SB (250 and 500 mg/kg i.g.) <sup>73</sup>                                                            | Pigmented rabbits                                | Protecting against visible light-induced retinal degeneration                                | Antioxidant, anti-inflammatory and antiapoptotic mechanisms                                                        |
| *Seeds, the oil (0.5 mL/day p. o.) <sup>74</sup>                                                                          | Rats                                             | Protecting against hypertensive retinopathy induced retina damage                            | Neuroprotective and antioxidant properties                                                                         |

|                                                                            |                      |                                               |                                                                                                                                |
|----------------------------------------------------------------------------|----------------------|-----------------------------------------------|--------------------------------------------------------------------------------------------------------------------------------|
| *Leaves, the aqueous extract (100, 200, 500, and 1000 µg/mL) <sup>75</sup> | Isolated goat lenses | Delaying onset and/or progression of cataract | Restoring the decreased levels of SOD and glutathione (GSH) in 500 and 1000 µg/mL dose and reducing MDA level in all the doses |
|----------------------------------------------------------------------------|----------------------|-----------------------------------------------|--------------------------------------------------------------------------------------------------------------------------------|

---

**Effects on gastrointestinal disease**

|                                                                                                                      |                                               |                                                                                                      |           |
|----------------------------------------------------------------------------------------------------------------------|-----------------------------------------------|------------------------------------------------------------------------------------------------------|-----------|
| Ripe fruits, the hexane extract (HRe-1) (1 mL/kg p. o.) <sup>76</sup>                                                | Rats                                          | Preventing stress-, indomethacin-induced gastric injury                                              | Not clear |
| Seeds, the oil; pulp, the oil (3.5 and 7 mL/kg /day, p. o.) <sup>77</sup>                                            | Rats                                          | Protecting against water immersion, reserpine, pylorus ligation, acetic acid induced gastric ulcers  | Not clear |
| Fruits and pulp, a commercially available formulation (4 ounces [35.6 g fruits and pulp], twice daily) <sup>78</sup> | Horses, stall-confined and intermittently fed | Preventing glandular ulcers, without a significant increase in gastric juice pH                      | Not clear |
| Fruits juice, polyphenolics <sup>79</sup>                                                                            | In vitro simulated model                      | Promoting the proliferation of bacteroides/prevotella group, lactic acid bacteria and bifidobacteria | Not clear |

---

**Other pharmacological effects**

|                                                                                      |      |                                                                                   |                                                                                                                                                                                                                         |
|--------------------------------------------------------------------------------------|------|-----------------------------------------------------------------------------------|-------------------------------------------------------------------------------------------------------------------------------------------------------------------------------------------------------------------------|
| Fruits, the water-soluble polysaccharide (50, 100 and 200 mg/kg p. o.) <sup>80</sup> | Mice | Anti-fatigue activity                                                             | Involving triglyceride (or fat) mobilization during exercise and protecting corpuscular membrane by preventing lipid oxidation via modifying several enzyme activities                                                  |
| *Leaves, the aqueous extracts (200 and 800 mg kg b. w. p. o.) <sup>81</sup>          | Rats | Anti-fatigue; Protecting against the exhaustive exercise-induced oxidative damage | Countering the increases of MDA levels, the increases of the activities of glutathione peroxidase (GPx), alanine aminotransferase and creatine kinase activities in the heart tissue induced by the exhaustive exercise |
| *Seeds, the oil (2.5 mL/kg b. w. p. o.) <sup>82</sup>                                | Rats | Protecting against hypobaric hypoxia-induced cerebral vascular injury             | Countering the increases of the free radicals and MDA levels and the decrease in the glutathione reductase (GR), GPx and SOD enzyme activities induced by hypoxia in the brain tissue                                   |

|                                                                                |      |                                                                                      |                                                                                                                                                            |
|--------------------------------------------------------------------------------|------|--------------------------------------------------------------------------------------|------------------------------------------------------------------------------------------------------------------------------------------------------------|
| *Leaves, the ethanol extract (50, 100 and 200 mg/kg b. w. p. o.) <sup>83</sup> | Rats | Protecting against hypoxia-induced pulmonary vascular leakage                        | Countering the increases of the free radicals and MDA levels and decrease in the GR, GPx and GSH levels induced by hypoxia in the lung homogenates         |
| Total flavonoids (70, 140 mg/kg, i. g.) <sup>84</sup>                          | Rats | Preventing cobalt chloride- and hypobaric chamber-induced high-altitude polycythemia | Not clear                                                                                                                                                  |
| *Leaves, the aqueous extracts (100 mg/kg b. w. p. o.) <sup>85</sup>            | Rats | The resistance effect to cold-hypoxia - restraint-induced hypothermia                | Countering the increases of ROS, SOD, catalase and MDA levels and the decrease of ratio of GSH/oxidized glutathione during cold-hypoxia-restraint exposure |

---

\*: Antioxidant activity

## References

- 1 H. Hibasami, A. Mitani, H. Katsuzaki, K. Imai, K. Yoshioka and T. Komiya, *Int. J. Mol. Med.*, 2005, **15**, 805-809.
- 2 U.K. Sharma, K. Sharma, N. Sharma, A. Sharma, H.P. Singh and A.K. Sinha, *J. Agr. Food Chem.*, 2008, **56**, 374-379.
- 3 Y. Zu, C. Li, Y. Fu and C. Zhao, *J. Pharmaceut. Biomed.*, 2006, **41**, 714-719.
- 4 R.M. Pop, C. Socaciu, A. Pintea, A.D. Buzoianu, M.G. Sanders, H. Gruppen and J.P. Vincken, *Phytochem. Anal.*, 2013, **24**, 484-492.
- 5 K. Yasukawa, S. Kitanaka, K. Kawata and K. Goto, *Fitoterapia*, 2009, **80**, 164-167.
- 6 R. Guo, X. Chang, X. Guo, C.S. Brennan, T. Li, X. Fu and R.H. Liu, *Food Funct.*, 2017, **8**, 4229-4240.
- 7 D. Rosch, A. Krumbein, C. Mugge and L.W. Kroh, *J. Agr. Food Chem.*, 2004, **52**, 4039-4046.
- 8 K. Tkacz, A. Wojdylo, I.P. Turkiewicz, F. Ferreres, D.A. Moreno and P. Nowicka, *Food Chem.*, 2020, **309**, 125766.
- 9 G. Zhang, Y. Liu and P. Liu, *J Agric Food Chem*, 2018, **66**, 12257-12264.
- 10 C. Chen, H. Zhang, W. Xiao, Z. Yong and N. Bai, *J. Chromatogr. A*, 2007, **1154**, 250-259.
- 11 D. Gutzeit, P. Winterhalter and G. Jerz, *J. Chromatogr. A*, 2007, **1172**, 40-46.
- 12 J. Zhang, W. Gao, M. Cao and D. Kong, *J. Asian Nat. Prod. Res.*, 2012, **14**, 1122-1129.
- 13 R. Li, Q. Wang, M. Zhao, P. Yang, X. Hu and D. Ouyang, *Fitoterapia*, 2019, **137**, 104248.
- 14 J.S. Kim, Y.S. Kwon, Y.J. Sa and M.J. Kim, *J Agric Food Chem*, 2011, **59**, 138-144.
- 15 C. Chen, X. Xu, Y. Chen, M. Yu, F. Wen and H. Zhang, *Food Chem.*, 2013, **141**, 1573-1579.
- 16 R.X. Guo, X. Guo, T. Li, X. Fu and R.H. Liu, *Food Chem.*, 2017, **221**, 997-1003.
- 17 R. Arimboor, K.S. Kumar and C. Arumughan, *J. Pharmaceut. Biomed.*, 2008, **47**, 31-38.
- 18 C.H. Cho, H. Jang, M. Lee, H. Kang, H.J. Heo and D.O. Kim, *J Microbiol Biotechnol*, 2017, **27**, 1257-1265.
- 19 D. Redei, N. Kusz, N. Jedlinszki, G. Blazso, I. Zupko and J. Hohmann, *Planta Med.*, 2018, **84**, 26-33.
- 20 R. Zheng, X. Xu, Z. Tian and J. Yang, *Nat. Prod. Res.*, 2009, **23**, 1451-1456.
- 21 C. Chen, W. Gao, L. Cheng, Y. Shao and D. Kong, *J. Asian Nat. Prod. Res.*, 2014, **16**, 231-239.
- 22 P.K. Pandey, B. Ahmed, J. Prasad, M. Bala and H.A. Khan, *Sci Rep*, 2019, **9**, 18873.
- 23 D.J. Kwon, Y.S. Bae, S.M. Ju, A.R. Goh, G.S. Youn, S.Y. Choi and J. Park, *Biochem. Bioph. Res. Co.*, 2012, **417**, 1254-1259.
- 24 E. Erhan, S. Terzi, M. Celiker, O. Yarali, M. Cankaya, F.K. Cimen, I. Malkoc and B. Suleyman, *Clin. Exp. Otorhinolar.*, 2017, **10**, 181-187.
- 25 D.D. Hou, Di ZH, R.Q. Qi, H.X. Wang, S. Zheng, Y.X. Hong, H. Guo, H.D. Chen and X.H. Gao, *Skin Pharmacol. Phys.*, 2017, **30**, 268-276.
- 26 A. Balkrishna, S.S. Sakat, K. Joshi, K. Joshi, V. Sharma, R. Ranjan, K. Bhattacharya and A. Varshney, *Front Pharmacol*, 2019, **10**, 1186.
- 27 B. Jayashankar, K.P. Mishra, L. Ganju and S.B. Singh, *Int. Immunopharmacol.*, 2014, **20**, 89-94.
- 28 M. Ilhan, I. Suntar, M.A. Demirel, E. Yesilada, H. Keles and A.E. Kupeli, *Taiwan. J. Obstet. Gyne.*, 2016, **55**, 786-790.
- 29 K.P. Mishra, R. Mishra, A.P. Yadav, B. Jayashankar, S. Chanda and L. Ganju, *Biomedicine & Aging Pathology*, 2011, **1**, 61-64.
- 30 B. Jayashankar, D. Singh, H. Tanwar, K.P. Mishra, S. Murthy, S. Chanda, J. Mishra, R. Tulswani, K.

- Misra, S.B. Singh and L. Ganju, *Int. Immunopharmacol.*, 2017, **44**, 123-136.
- 31 H. Diandong, G. Feng, L. Zaifu, T. Helland, F. Weixin and C. Liping, *Int J Immunopathol Pharmacol*, 2016, **29**, 76-83.
- 32 L. Zhao, M. Li, K. Sun, S. Su, T. Geng and H. Sun, *Int. J. Biol. Macromol.*, 2020, **155**, 1202-1215.
- 33 H. Wang, H. Bi, T. Gao, B. Zhao, W. Ni and J. Liu, *Int. J. Biol. Macromol.*, 2018, **107**, 1039-1045.
- 34 D. Hou, D. Wang, X. Ma, W. Chen, S. Guo and H. Guan, *Int. J. Immunopath. Ph.*, 2017, **30**, 353-361.
- 35 S. Taysi, K. Gumustekin, B. Demircan, O. Aktas, N. Oztasan, F. Akcay, H. Suleyman, S. Akar, S. Dane and M. Gul, *Pharm. Biol.*, 2010, **48**, 488-493.
- 36 Y. Hsu, C. Tsai, W. Chen and F. Lu, *Food Chem. Toxicol.*, 2009, **47**, 2281-2288.
- 37 D.T. Maheshwari, K.M. Yogendra, S.K. Verma, V.K. Singh and S.N. Singh, *Food Chem. Toxicol.*, 2011, **49**, 2422-2428.
- 38 H. Liu, W. Zhang, S. Dong, L. Song, S. Zhao, C. Wu, X. Wang, F. Liu, J. Xie, J. Wang and Y. Wang, *J. Ethnopharmacol.*, 2015, **176**, 69-78.
- 39 X. Wang, J. Liu, X. Zhang, S. Zhao, K. Zou, J. Xie, X. Wang, C. Liu, J. Wang and Y. Wang, *Phytomedicine*, 2018, **38**, 90-97.
- 40 D.C. Wen, X.Y. Hu, Y.Y. Wang, J.X. Luo, W. Lin, L.Y. Jia and X.Y. Gong, *J. Ethnopharmacol.*, 2016, **192**, 67-73.
- 41 X. Pang, J. Zhao, W. Zhang, X. Zhuang, J. Wang, R. Xu, Z. Xu and W. Qu, *J. Ethnopharmacol.*, 2008, **117**, 325-331.
- 42 J. Wang, W. Zhang, D. Zhu, X. Zhu, X. Pang and W. Qu, *J. Sci. Food Agr.*, 2011, **91**, 1446-1451.
- 43 K.M. Linderborg, H.M. Lehtonen, R. Jarvinen, M. Viitanen and H. Kallio, *Int. J. Food Sci. Nutr.*, 2012, **63**, 483-490.
- 44 K. Suchal, J. Bhatia, S. Malik, R.K. Malhotra, N. Gamad, S. Goyal, T.C. Nag, D.S. Arya and S. Ojha, *Front. Pharmacol.*, 2016, **7**, 155.
- 45 S. Malik, S. Goyal, S.K. Ojha, S. Bharti, S. Nepali, S. Kumari, V. Singh and D.S. Arya, *Int. J. Toxicol.*, 2011, **30**, 671-680.
- 46 J. Cheng, K. Kondo, Y. Suzuki, Y. Ikeda, X. Meng and K. Umemura, *Life Sci.*, 2003, **72**, 2263-2271.
- 47 B. Olas, B. Kontek, P. Malinowska, J. Zuchowski and A. Stochmal, *Oxid. Med. Cell. Longev.*, 2016, **2016**, 4692486.
- 48 B. Olas, B. Kontek, M. Szczesna, L. Grabarczyk, A. Stochmal and J. Zuchowski, *J. Physiol. Pharmacol.*, 2017, **68**, 223-229.
- 49 X. Zhuo, Y. Tian, Y. Wei, Y. Deng, Y. Wu and T. Chen, *Biosci Biotechnol Biochem*, 2019, **83**, 2000-2007.
- 50 M. Basu, R. Prasad, P. Jayamurthy, K. Pal, C. Arumughan and R.C. Sawhney, *Phytomedicine*, 2007, **14**, 770-777.
- 51 W. Zhang, J. Zhao, J. Wang, X. Pang, X. Zhuang, X. Zhu and W. Qu, *Phytother. Res.*, 2010, **24**, 228-232.
- 52 H.M. Lehtonen, R. Jarvinen, K. Linderborg, M. Viitanen, M. Venojarvi, H. Alanko and H. Kallio, *Eur. J. Clin. Nutr.*, 2010, **64**, 1465-1471.
- 53 B. Padmavathi, M. Upreti, V. Singh, A.R. Rao, R.P. Singh and P.C. Rath, *Nutr. Cancer*, 2005, **51**, 59-67.
- 54 B.S. Teng, Y.H. Lu, Z.T. Wang, X.Y. Tao and D.Z. Wei, *Pharmacol. Res.*, 2006, **54**, 186-194.
- 55 G.T. Zhamanbaeva, M.K. Murzakhmetova, S.T. Tuleukhanov and M.P. Danilenko, *Bull Exp Biol*

- Med*, 2014, **158**, 252-255.
- 56 H. Wang, T. Gao, Du Y, H. Yang, L. Wei, H. Bi and W. Ni, *Carbohydr. Polym.*, 2015, **131**, 288-296.
- 57 S.J. Kim, E. Hwang, S.S. Yi, K.D. Song, H.K. Lee, T.H. Heo, S.K. Park, Y.J. Jung and H.S. Jun, *Appl. Biochem. Biotech.*, 2017, **182**, 1663-1674.
- 58 Y. Xu, G. Li, C. Han, L. Sun, R. Zhao and S. Cui, *Biol. Pharm. Bull.*, 2005, **28**, 490-494.
- 59 F. Batool, A.H. Shah, S.D. Ahmed, Z.S. Saify and D.J. Haleem, *Med Sci Monit*, 2010, **16**, R285-R292.
- 60 D.P. Attrey, A.K. Singh, T. Naved and B. Roy, *Indian journal of experimental biology*, 2012, **50**, 690-695.
- 61 S. Narayanan, D. Ruma, B. Gitika, S.K. Sharma, T. Pauline, M.S. Ram, G. Ilavazhagan, R.C. Sawhney, D. Kumar and P.K. Banerjee, *Mol. Cell. Biochem.*, 2005, **278**, 9-14.
- 62 M. Manickam and R. Tulsawani, *PLoS One*, 2014, **9**, e87694.
- 63 S. Shivapriya, K. Ilango and G.P. Dubey, *Saudi J. Biol. Sci.*, 2015, **22**, 645-650.
- 64 J. Zhang, C. Wang, C. Wang, B. Sun and C. Qi, *Food Funct.*, 2018, **9**, 5402-5416.
- 65 B.A. Khan and N. Akhtar, *Postepy dermatologii i alergologii*, 2014, **31**, 229-234.
- 66 I.S. Hwang, J.E. Kim, S.I. Choi, H.R. Lee, Y.J. Lee, M.J. Jang, H.J. Son, H.S. Lee, C.H. Oh, B.H. Kim, S.H. Lee and D.Y. Hwang, *Int. J. Mol. Med.*, 2012, **30**, 392-400.
- 67 A. Gegotek, A. Jastrzab, I. Jarocka-Karpowicz, M. Muszynska and E. Skrzydlewska, *Antioxidants*, 2018, **7**, 110.
- 68 H. Ito, S. Asmussen, D.L. Traber, R.A. Cox, H.K. Hawkins, R. Connelly, L.D. Traber, T.W. Walker, E. Malgerud, H. Sakurai and P. Enkhbaatar, *Burns*, 2014, **40**, 511-519.
- 69 J. Kim and C.M. Lee, *Int. J. Biol. Macromol.*, 2017, **99**, 586-593.
- 70 P.S. Larmo, R.L. Järvinen, N.L. Setälä, B. Yang, M.H. Viitanen, J.R.K. Engblom, R.L. Tahvonen and H.P. Kallio, *The Journal of Nutrition*, 2010, **140**, 1462-1468.
- 71 Y. Kimura, D. Mori, T. Imada, Y. Izuta, M. Shibuya, H. Sakaguchi, E. Oonishi, N. Okada, K. Matsumoto and K. Tsubota, *Nutrients*, 2017, **9**, 364.
- 72 Y. Wang, L. Zhao, Y. Huo, F. Zhou, W. Wu, F. Lu, X. Yang, X. Guo, P. Chen, Q. Deng and B. Ji, *Nutrients*, 2016, **8**, 245.
- 73 Y. Wang, F. Huang, L. Zhao, D. Zhang, O. Wang, X. Guo, F. Lu, X. Yang, B. Ji and Q. Deng, *J Agric Food Chem*, 2016, **64**, 161-170.
- 74 K. Bouras, K. Kopsidas, M. Bariotakis, P. Kitsiou, K. Kapodistria, G. Agrogiannis, I. Vergados, P. Theodossiadis and D. Perrea, *Biomedicine hub*, 2017, **2**, 1-12.
- 75 S. Dubey, P. Deep and A.K. Singh, *Vet. Ophthalmol.*, 2016, **19**, 144-148.
- 76 H. Suleyman, L.O. Demirezer, M.E. Buyukokuroglu, M.F. Akcay, A. Gepdiremen, Z.N. Banoglu and F. Gocer, *Phytotherapy research*, 2001, **15**, 625-627.
- 77 J. Xing, B. Yang, Y. Dong, B. Wang, J. Wang and H.P. Kallio, *Fitoterapia*, 2002, **73**, 644-650.
- 78 N.K. Huff, A.D. Auer, F.J. Garza, M.L. Keowen, M.T. Kearney, R.B. McMullin and F.M. Andrews, *J Vet Intern Med*, 2012, **26**, 1186-1191.
- 79 S. Attri, K. Sharma, P. Raigond and G. Goel, *Food Res. Int.*, 2018, **105**, 324-332.
- 80 W. Ni, T. Gao, H. Wang, Du Y, J. Li, C. Li, L. Wei and H. Bi, *J. Ethnopharmacol.*, 2013, **150**, 529-535.
- 81 X. Zheng, W. Long, G. Liu, X. Zhang and X. Yang, *J. Sci. Food Agr.*, 2012, **92**, 736-742.
- 82 J. Purushothaman, G. Suryakumar, D. Shukla, A.S. Malhotra, H. Kasiganesan, R. Kumar, R.C. Sawhney and A. Chami, *Brain Res. Bull.*, 2008, **77**, 246-252.

- 83 J. Purushothaman, G. Suryakumar, D. Shukla, H. Jayamurthy, H. Kasiganesan, R. Kumar and R.C. Sawhney, *Evid.-Based Compl. Alt.*, 2011, **2011**, 574524.
- 84 J.Y. Zhou, S.W. Zhou, Du XH and S.Y. Zeng, *Molecules*, 2012, **17**, 11585-11597.
- 85 P. Sharma, G. Suryakumar, V. Singh, K. Misra and S.B. Singh, *Int. J. Biometeorol.*, 2015, **59**, 1115-1126.
